# Supplementary material
Source: ML conference proceedings conference paper supplement (https://proceedings.neurips.cc/paper_files/paper/2020/hash/e2a23af417a2344fe3a23e652924091f-Abstract.html)

Frisk( $\alpha = 3\text{e-}02$ )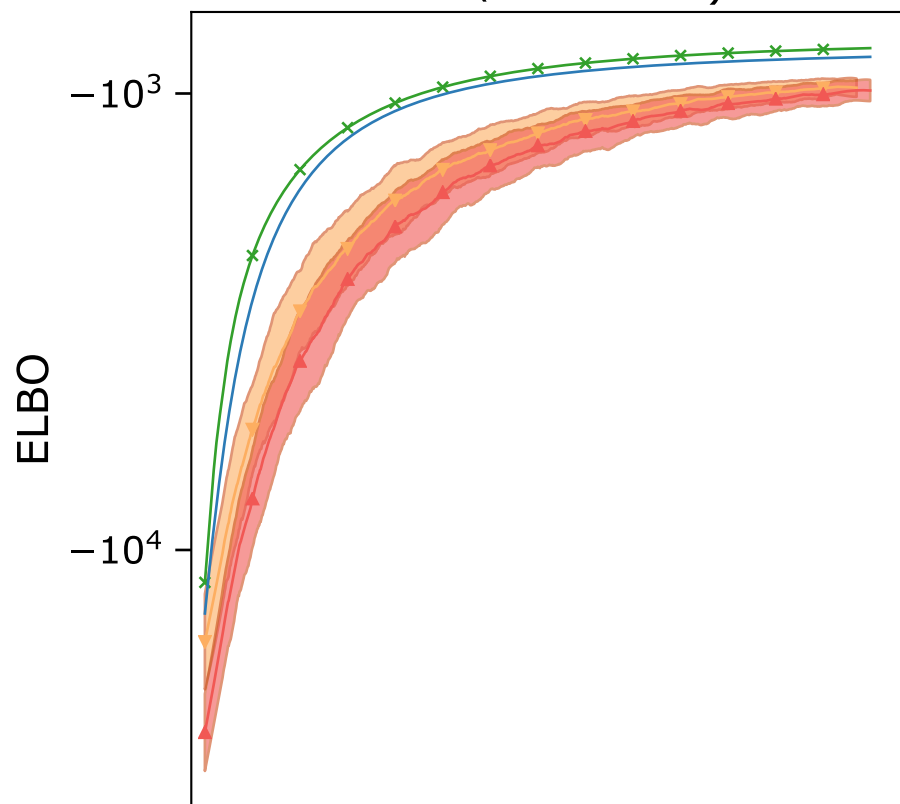Frisk( $\alpha = 5\text{e-}02$ )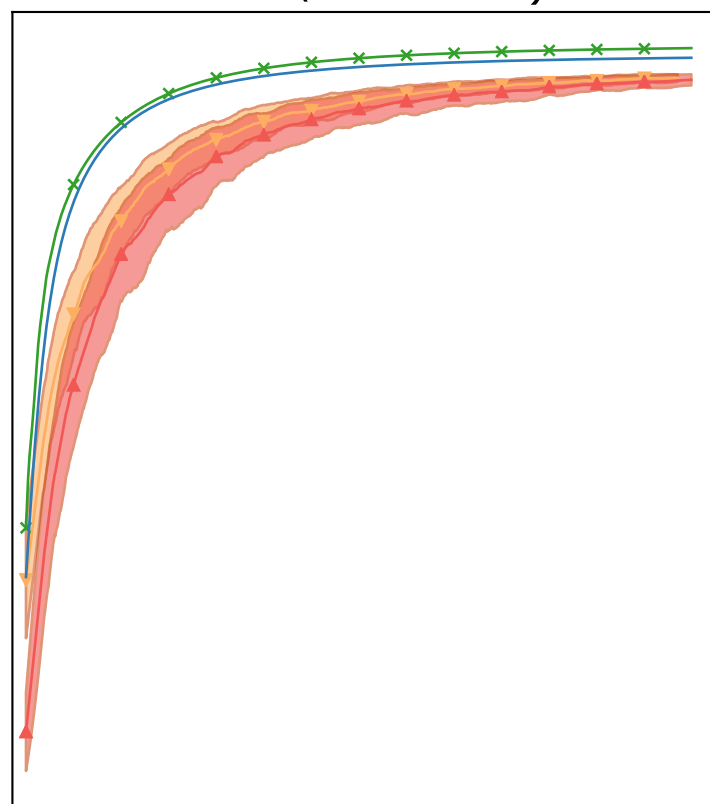Frisk( $\alpha = 7\text{e-}02$ )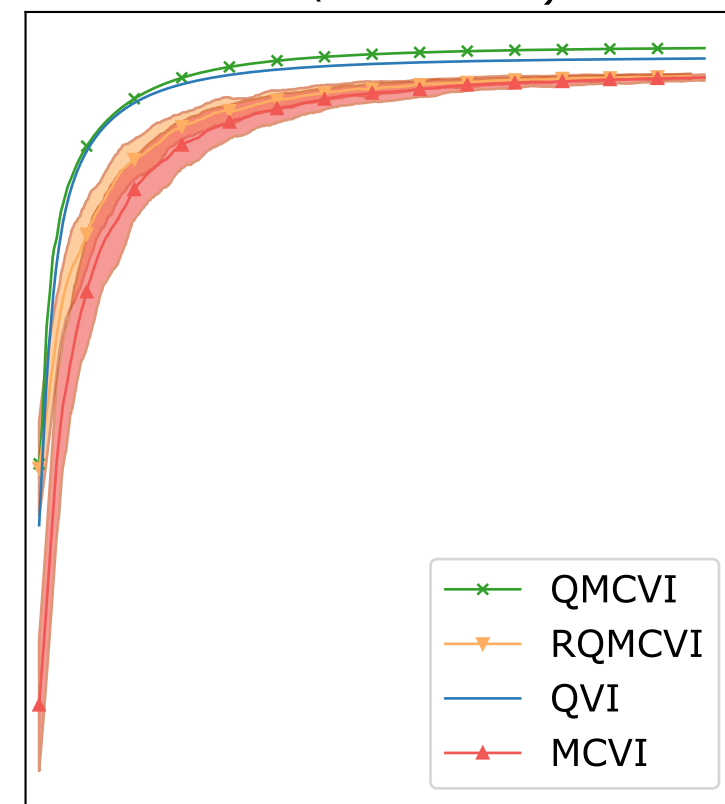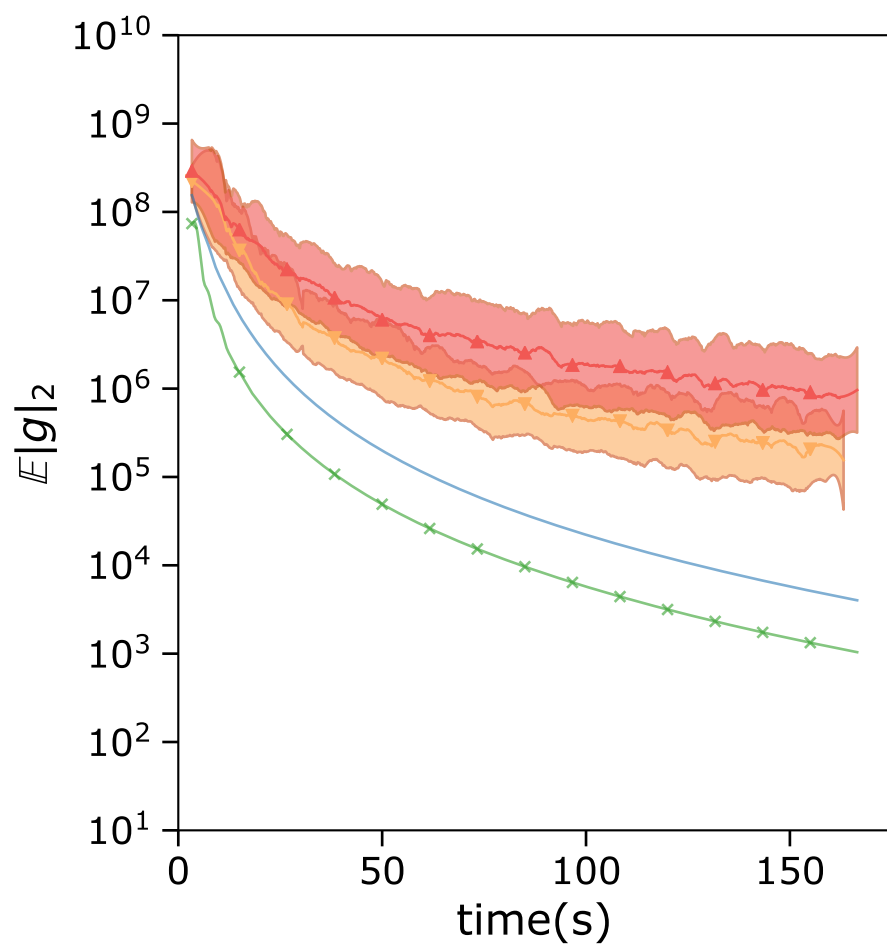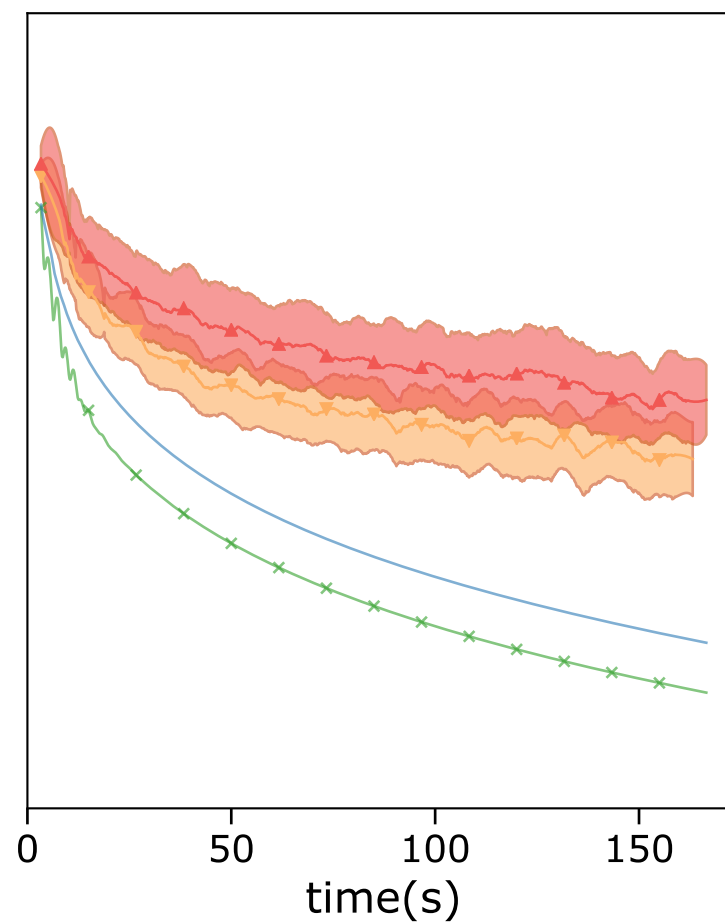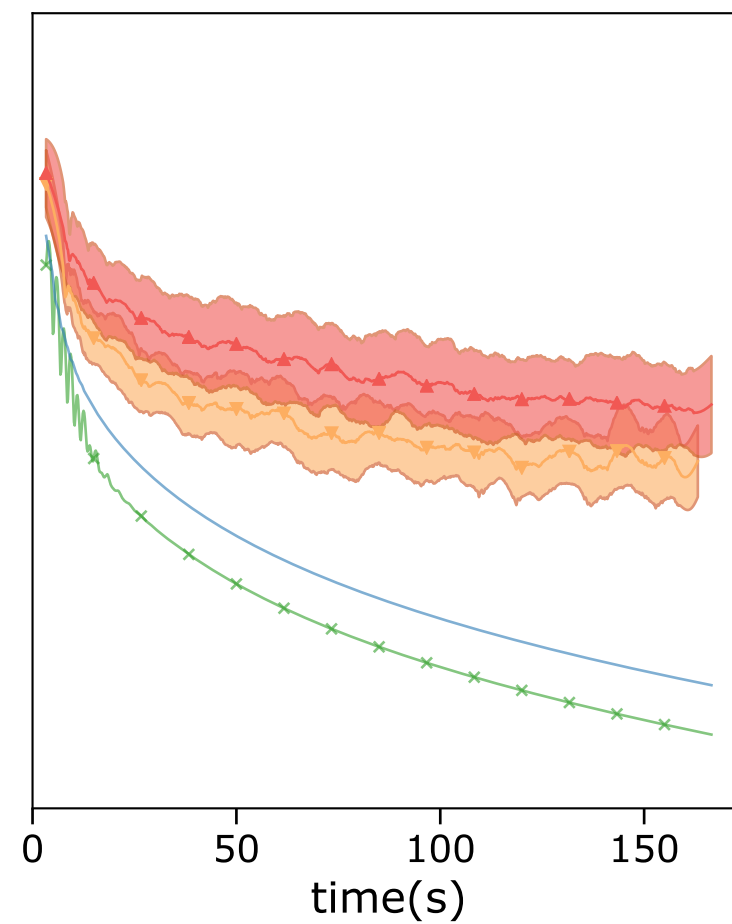

Supplement: Supplementary file [file e2a23af417a2344fe3a23e652924091f-Supplemental.zip]
